1 Self-organization of songbird neural sequences  
2 during social isolation

3 Emily L. Mackevicius<sup>1</sup>, Shijie Gu<sup>1</sup>, Natalia I. Denisenko<sup>1</sup>, and  
4 Michale S. Fee<sup>1</sup>

5 <sup>1</sup>McGovern Institute for Brain Research, Department of Brain and  
6 Cognitive Sciences, MIT

7 February 17, 2022

8 **Abstract**

9 Behaviors emerge via a combination of experience and innate predis-  
10 positions. As the brain matures, it undergoes major changes in cellular,  
11 network and functional properties that can be due to sensory experience  
12 as well as developmental processes. In normal birdsong learning, neural  
13 sequences emerge to control song syllables learned from a tutor. Here, we  
14 disambiguate the role of experience and development in neural sequence  
15 formation by delaying exposure to a tutor. Using functional calcium imag-  
16 ing, we observe neural sequences in the absence of tutoring, demonstrating  
17 that experience is not necessary for the formation of sequences. However,  
18 after exposure to a tutor, pre-existing sequences can become tightly asso-  
19 ciated with new song syllables. Since we delayed tutoring, only half our  
20 birds learned new syllables following tutor exposure. The birds that failed  
21 to learn were the birds in which pre-tutoring neural sequences were most  
22 ‘crystallized’, that is, already tightly associated with their (untutored)  
23 song.

24 **1 Introduction**

25 On the one hand, sensory experience is known to be essential for the normal  
26 development of brain circuits. On the other hand, genetically specified develop-  
27 mental processes are also essential – we learn too quickly and from too sparse  
28 data to rely on sensory experience alone [1]. Thus, it appears that the brain  
29 is able to use genetically specified predispositions to fill in gaps in its sensory  
30 experience. When typical sensory experience is absent or delayed, certain as-  
31 pects of brain development proceed anyway, while other aspects are delayed.  
32 This is true both in primary sensory systems [2, 3, 4, 5], and for more cognitive  
33 behaviors such as social interaction and language [6, 7, 8]. Brain circuits ac-  
34 quire structure and organization even in the absence of typical training inputs.

35 Here we examine this self-organized structure, and what happens when sensory  
36 experience is reintroduced, in the context of songbird vocal learning.

37 Song learning is influenced by both auditory exposure to a particular tutor  
38 song, and by inherited preferences [9]. It is well known that songbirds, in the  
39 absence of exposure to a tutor bird, develop ‘isolate’ songs, with highly vari-  
40 able and atypical syllable rhythms [10, 11, 12]. However, when these ‘isolate’  
41 songs are used as tutor songs, after two generations birds sing normally again,  
42 suggesting that an ‘innate’ preference filters what aspects of a tutor song are  
43 actually imitated [12]. Song imitation requires remarkably little total exposure  
44 to a tutor song – approximately 75 seconds total on a single day is enough for a  
45 bird to remember a song, and subsequently practice and imitate it [13]. Zebra  
46 finches, like many songbird species, are able to imitate songs of birds from other  
47 species, but when given a choice they prefer zebra finch song [14]. Furthermore,  
48 inherited genetic predispositions have a strong effect on both the precise tempo  
49 at which a zebra finch sings its song [15], as well as the particular learning styles  
50 of individual birds [16]. Thus, within the songbird brain we expect to see an  
51 interplay between developmentally specified and learned structure.

52 There are several possibilities for what happens in the brain during isolate  
53 song, and how it compares to typical (tutored) brain development. In typical  
54 birds, neurons in HVC are initially only weakly coupled to song, firing only  
55 at the onsets of syllables when birds are babbling subsong [17]. Then, as the  
56 song becomes more mature and repeatable, each HVC projection neuron fires at  
57 its own precise moment during the song, together forming a stable sequence of  
58 neural firing that tiles the song [17, 18, 19], in interplay with inhibitory neurons  
59 [20, 21]. This maturation process in HVC has been modeled as an initially ran-  
60 dom network of neurons that, with the right training inputs and plasticity rules,  
61 assembles into a chain of sequentially connected neurons [22, 23, 17] (Figure 1A).  
62 However, what happens in birds isolated from a tutor? Compared to typical  
63 adult zebra finch song, isolate song has a much less stable sequence of syllables  
64 and abnormally variable acoustic structure and timing [12]. In fact, aspects of  
65 isolate song resemble features of early babbling (subsong). Does HVC in isolate  
66 birds resemble that of subsong birds? Or does HVC mature to form sequences,  
67 even without experience of a tutor, and without the behavioral stereotypy seen  
68 in adult birds? We use functional calcium imaging in singing isolated birds to  
69 address these questions.

70 By observing the neural activity in HVC of isolated birds, we found that the  
71 HVC network activity can mature into long repeatable sequences even without  
72 exposure to a tutor. However, there are some key differences between typical  
73 adult HVC sequences and those found in isolated birds, suggesting which fea-  
74 tures of HVC development rely on exposure to a tutor. Next, we observe HVC  
75 in isolated birds immediately before and after delayed exposure to a tutor. Birds  
76 isolated from a tutor are able to learn a song if exposed to a tutor before the  
77 end of a critical period, typically around age 65 days post hatch (dph), but are  
78 increasingly unable to learn at later ages [24, 25, 26]. Although only half of  
79 our late tutored birds successfully learned from the tutor, we observed an in-  
80 teresting correlation between HVC activity prior to tutoring and the degree to

81 which birds learned. Namely, birds with highly song-locked HVC activity prior  
82 to tutoring typically failed to learn, while birds with less song-locked activity  
83 tended to learn. In the birds that did learn, we were able to track sequences  
84 throughout the course of learning. Pre-existing self-organized HVC sequences  
85 persisted throughout major changes to the song, forming a substrate for newly  
86 learned song elements. Together, these results point at how the brain may self-  
87 organize, and at the interplay between self-organized structure and the ability  
88 to incorporate new information from a tutor.

## 89 2 Results

### 90 2.1 Neural sequences are present in isolated birds, but 91 atypical

92 We first asked whether the songs of isolated birds involve the same neural path-  
93 ways and neuronal sequences responsible for generating typical song. We carried  
94 out functional calcium imaging of large populations of neurons in HVC of iso-  
95 lated birds at a range of ages. Sequences of neuronal activity in HVC have  
96 previously been analyzed by aligning neuronal activity to repeatable elements  
97 of the song [27], an approach with limited utility in isolated birds due to the high  
98 variability of their songs. Instead, we extract neural sequences directly from the  
99 calcium signals using an unsupervised algorithm [28] to find the sequences that  
100 best fit the neural data. This technique reveals the existence of significant se-  
101 quential activity in HVC of isolated birds (Figure 1B,C). It also reveals long  
102 continuous sequences in data acquired from typical adult HVC (Figure 1D) as  
103 expected from previous work [27, 19, 18].

104 The sequences found in isolated birds are surprisingly typical in some re-  
105 spects, but atypical in others, especially in their correlation to vocal output. As  
106 in typical HVC sequences, neurons in isolated birds participate at characteristic  
107 moments during the sequence (Figure 1E), and many neurons participate in at  
108 least one sequence (Figure 1F). Neurons that participate in a sequence tend to  
109 fire at a majority of sequence occurrences (Figure 1G). Neural sequences are cor-  
110 related with precisely timed song features in isolated birds' song (Figure 1H, I,  
111 song features calculated as in [29]). However, song locking in isolated birds was  
112 only on average 0.58 times as strong as in a typically tutored adult bird (Figure  
113 1J, see Methods). Finally, in isolated birds, on average only 61% of each song  
114 bout is represented by a detected HVC sequence, substantially less than the  
115 complete sequence coverage found in typically tutored birds [19, 18, 17] (Figure  
116 1K, see Methods). HVC activity in isolated birds exhibits additional qualitative  
117 differences from that in typically tutored birds. While HVC neurons generate  
118 only brief bursts of spikes in tutored birds, neurons in isolated birds sometimes  
119 generated extended periods of continuous activity, especially during long sylla-  
120 bles of variable duration (Figure 1L, 7/8 birds exhibited multiple instances of  
121 persistent activity, coordinated across at least 3 neurons, and lasting at least  
122 500ms). This contrasts with long syllables of typical adult song which are all

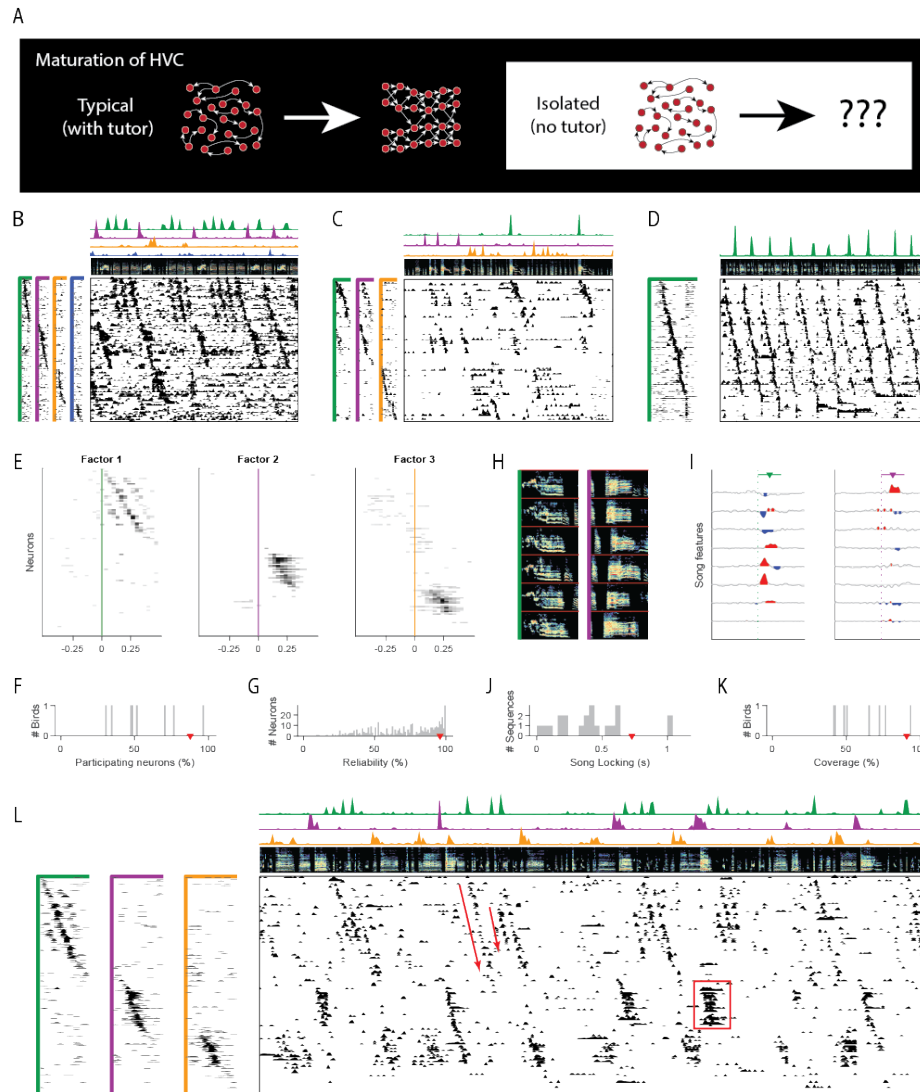

Figure 1: Sequences in isolated birds

(A) Diagram of HVC maturation. In typically tutored birds, HVC sequences appear to grow and differentiate over time. (B) Example neural sequences recorded in a singing isolated bird (older juvenile, 61 dph). Main panel (lower right), functional calcium imaging recordings from 98 neurons for a duration of 6 s. Rows (neurons) sorted according to sequences (factors) extracted by unsupervised algorithm seqNMF (see Methods). (Above) Song spectrogram (0-10 kHz). The four sequence factor exemplars and timecourses are shown to the left and above, in corresponding colors. Duration of factor exemplars: 0.5 s. (C) Same as B, for another example isolated bird (adult, 117 dph). (D) Same as in B, for a typically tutored bird (adult, 217 dph). (E) Time-lagged cross correlation between each neuron and each of the three extracted factors recorded in a singing isolated bird (older juvenile, 68 dph). Only significant bins in the cross correlation are shown ( $p < 0.05$ , Bonferroni corrected, compared to a circularly-shifted control). (F, G, J, K) Sequence properties in isolated birds. For reference, median for typically tutored bird in D shown in red. (F) Percent of neurons participating in at least one extracted sequence. (G) Reliability of participating neurons across sequence renditions. (H) Example song spectrograms (0.5 s) extracted at moments when neural sequences were detected in an isolated bird (older juvenile, 64 dph) (I) Correlation of these sequences with eight song features (top to bottom: amplitude, entropy, pitch goodness, aperiodicity, mean frequency, pitch, frequency modulation, amplitude modulation). Factor duration 0.5 s, indicated by colored bars above, triangle at center. (J) Strength of song locking (see Methods). (K) Percent of the song covered by some sequence. (L) Example of sequence abnormalities in an isolated bird (same as in E). Sequences of inconsistent length (8/8 isolated birds) and ensemble persistent activity (7/8 isolated birds) are annotated in red.

123 generated by extended sequences of brief bursts. In addition, HVC sequences  
124 in isolated birds exhibit variable durations, often truncating at different points  
125 (Figure 1L, 8/8 birds), producing syllables of highly variable duration. Such  
126 truncations in the middle of a syllable sequence are very unusual in typically  
127 tutored birds [30]. These atypical modes of HVC activity suggest several possi-  
128 ble mechanisms to understand characteristic features of isolate song, abnormally  
129 long syllables and those of variable duration [12]. For example, syllables in iso-  
130 lated birds may exhibit variable duration when their underlying HVC sequences  
131 are truncated at different points.

132 We wondered if the existence of sequences in HVC of socially isolated birds  
133 occurs only after the closure of the critical period (i.e. a product of an already  
134 atypical isolate song) or whether they develop at an even earlier age when birds  
135 have not yet heard a tutor song, but can still be tutored. We recorded in 5  
136 birds at ages 57-64 dph, prior to tutor exposure, and found strong evidence for  
137 HVC sequences (Figure S1A). There was not a significant correlation between  
138 the age of the bird and any sequence features we measured (Figure S1B-F,  
139 linear regression model, significance threshold  $p < 0.5$ , comparing to a constant  
140 model). The correlations were not significant both when we restricted to birds  
141 within the traditional critical period ( $< 65$  dph), and when we included data  
142 from three older isolated birds (68-117 dph). Thus, the large (several fold) bird-  
143 to-bird variability in sequence properties (Figure S1B-F) is not explained by  
144 age, and likely due to inter-individual variability in developmental timecourses.

## 145 **2.2 Prior to tutoring, birds that will learn exhibit HVC** 146 **sequences that are relatively immature and decoupled** 147 **from vocal output**

148 Next, we asked whether properties of the HVC sequences relate to the ability  
149 of birds to learn a new song from a tutor. Many of our young isolated birds  
150 were eventually tutored at an age around the critical period and we found that  
151 half of them learned elements of their tutor song, while the others developed  
152 fully isolate song. We classified birds as learners if their song had an Imitation  
153 Score metric [31] greater than 0.5. The songs of non-learners remained highly  
154 variable and isolate-like even after tutoring (Figure 3A). In contrast, learner  
155 birds developed a new syllable within a day or two after tutoring, and ultimately  
156 sang typical adult song, consisting of stereotyped motifs (Figure 3B).

157 An analysis of HVC activity revealed that sequences prior to tutoring were  
158 systematically less mature/‘crystallized’ in birds that learned than in birds that  
159 failed to learn. Learner birds had fewer sequences than non-learners (Figure  
160 2C, average 2 sequences in learners, 3.25 sequences in non-learners,  $p = 0.029$ ,  
161 Wilcoxon rank sum test). Sequences in learner birds were more weakly corre-  
162 lated to song features (Figure 2D, average 0.20 s learner, 0.55 s non-learner,  $p$   
163  $= 0.0034$ , Wilcoxon rank sum test). Sequences in learners had lower autocorre-  
164 lation, a measure of how repeatably/rhythmically they are produced [17], than  
165 non-learners (Figure 2E, average 0.125 s learner, 0.244 s non-learner,  $p = 0.018$ ,

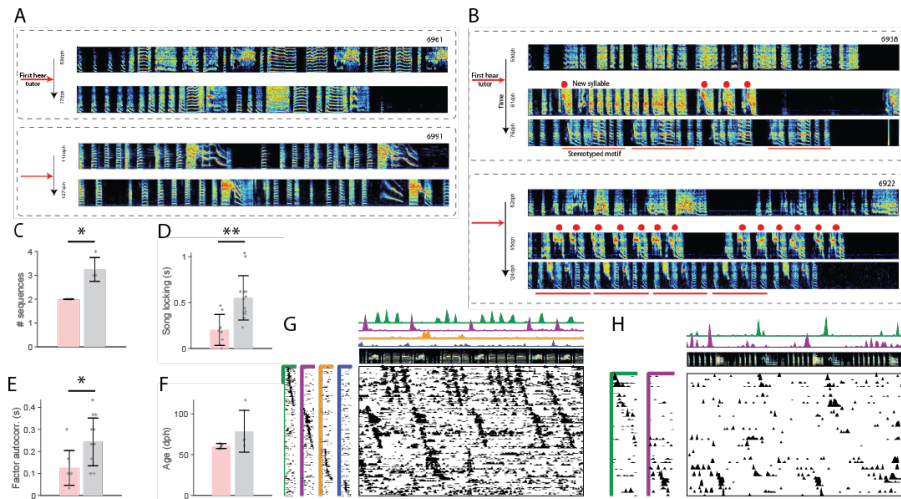

Figure 2: Relation between HVC sequence maturity and subsequent song learning  
 (A) Example spectrograms for two non-learner birds, prior to tutoring and several weeks later (at least 77dph). (B) Example spectrograms for two learners, prior to tutoring, shortly after tutoring, and several weeks later. Red dots mark the new syllable. Red bars mark stereotyped motif. (C-E) Three measures of HVC sequence maturity for learners (pink) and non-learners (gray). Error bars denote standard deviation (\* :  $p < 0.05$ , \*\* :  $p < 0.01$ ). (c) Number of sequences in HVC. (D) Fraction of neurons that participate in a sequence. (E) Autocorrelation of sequence factor timecourses. (F) Age of first tutoring for learners and non-learners. (G-H) Example pre-tutoring data from two birds that were brothers. (G) A non-learner, first tutored at 61 dph. (H) A learner, first tutored at 64 dph.



166 Wilcoxon rank sum test). Three additional measures of sequence maturity, all  
167 related to intrinsic sequence properties were calculated. While non-learners also  
168 trended higher in these measures, the differences were not significant (Wilcoxon  
169 rank sum tests, Neural participation: average 45% learner, 70% non-learner,  
170  $p = 0.2$ ; Reliability: average 69% learner, 74% non-learner,  $p = 1$ ; Coverage:  
171 average 51% learner, 71% non-learner,  $p = 0.34$ ).

172 The age of tutoring was not significantly correlated with whether the bird  
173 was a learner or non-learner (Figure 3F, average 60.5 dph learner, 78.75 dph  
174 non-learner,  $p = 0.11$ , Wilcoxon rank sum test). For example, one of the younger  
175 birds in our dataset (61 dph) was a non-learner, and had particularly clear HVC  
176 sequences before tutoring (Figure 3G). This bird's brother, tutored 3 days later,  
177 was a learner, and had sequences that appear far less mature (Figure 3H). To-  
178 gether, these results suggest that the presence, at the time of tutoring, of robust  
179 song-locked sequences, may inhibit learning. In other words, learning may be  
180 better supported by more immature sequences that are more independent from  
181 vocal output.

### 182 **2.3 Tracking HVC sequences across rapidly learned song** 183 **changes**

184 In late-tutored birds that learned, the speed with which new syllables appeared  
185 was striking. These birds developed a new syllable within a day or two after  
186 tutoring (Figure 2A, B), as has been previously described [32, 33, 34]. These  
187 new syllables appeared to emerge *de-novo*, not by syllable differentiation as is  
188 common in tutored birds.

189 We wondered if these birds, which learned a new syllable rapidly after tu-  
190 toring, formed a *de-novo* HVC sequence for this new syllable, or perhaps used  
191 a pre-existing sequence. We were able to track neurons in our calcium imaging  
192 data throughout the course of tutoring (Figure 3A, see Methods, Gu et al., in  
193 preparation), enabling us to see what happens to neural activity during rapid  
194 changes in the song. We first extracted neural sequences associated with new  
195 post-tutoring syllables, then followed these neurons back in time to find that the  
196 sequence existed even prior to tutoring (Figure 3B,C, see Methods). However,  
197 the sequence prior to tutoring was surprisingly 'latent'. That is, the sequence  
198 was relatively uncoupled to vocal output, without a strong correlation to song  
199 syllables. Combining data from the four birds that learned a new syllable rapidly  
200 after tutoring, neural sequences extracted two days after tutoring appeared to  
201 become more song locked after tutoring (Figure 3D,  $p=0.0048$ , Wilcoxon rank  
202 sum test).

203 Next, we aimed to control for the possibility that the appearance of se-  
204 quences becoming progressively more locked to vocal output after tutoring was  
205 due to the fact that sequences were extracted from neural data recorded after  
206 tutoring. We directly extracted HVC sequences from exclusively pre-tutoring  
207 neuronal data and tracked them forward in time until a new syllable appeared.  
208 Sequences that were initially relatively 'latent' persisted, becoming progressively  
209 more correlated with vocal output, ultimately tightly locked to a new syllable

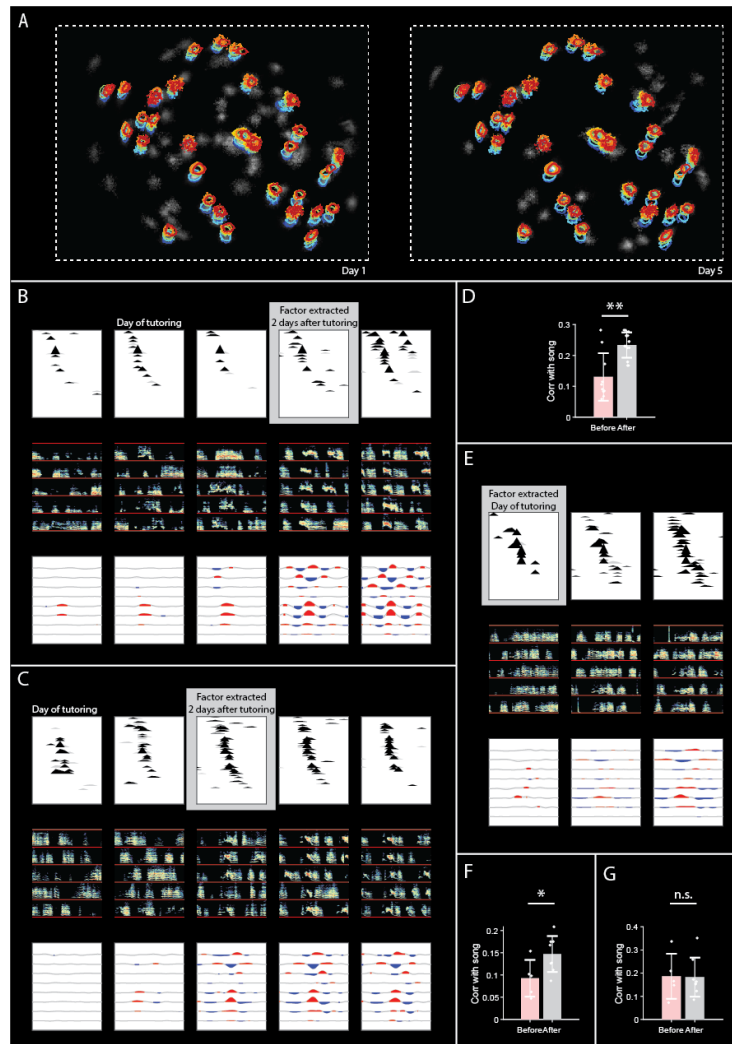

Figure 3: Tracking HVC sequences as isolated birds rapidly learn a new syllable (A) Neurons detected before (left) and after (right) tutoring shown in grayscale (CNMF\_E algorithm). Colored contours indicate locations of neurons tracked across five days, from blue to red (B) Sequence in HVC, tracked before and after first tutor exposure (see Methods), through the development of a new syllable. Sequence extracted from data two days after tutoring, and neurons sorted according to participation in this sequence. (Top) On each recording day, cross correlation of neurons with the sequence that becomes associated with the new syllable. Significant bins are shown in black, non-significant bins in gray ( $p=0.05$ , Bonferroni corrected, compared to circularly-shifted control) (Middle) On each recording day, example spectrograms at times when the sequence occurs on each day (Bottom) On each recording day, cross-correlation of sequence with acoustic features (amplitude, entropy, pitch goodness, aperiodicity, mean frequency, pitch, frequency modulation, and amplitude modulation) (C) Same as B for a different example bird. (D) Correlation with song amplitude before (pink) and after (gray) tutoring for all sequences in learner birds extracted data when a new syllable had been learned. (E) Similar to B and C, for a different example bird. Here sequences are extracted from pre-tutoring data, then tracked forward in time. (F) Song locking (maximum cross-correlation with song amplitude) before and after tutoring for the pre-tutoring sequences that had weaker song locking. (G) Song locking before and after tutoring for the pre-tutoring sequences that started off with stronger song locking.



210 (Figure 3E). Each of the ‘learner’ birds appeared to have two HVC sequences  
211 present prior to tutoring. Of these sequences, the ones that started off less  
212 correlated with song amplitude exhibited a significant increase in correlation  
213 with song amplitude after tutoring (Figure 3F,  $p=.045$ , Wilcoxon rank sum  
214 test). The sequences that started off more correlated with song amplitude did  
215 not significantly change their correlation with song amplitude (Figure 3G,  $p=1$ ,  
216 Wilcoxon rank sum test). Together, these results are consistent with the view  
217 that the emergence of new syllables after tutoring may co-opt existing HVC  
218 sequences, including relatively ‘latent’ sequences.

### 219 3 Discussion

220 We set out to determine whether the formation of sequences in HVC depends  
221 on prior exposure to a tutor song. By observing the neural activity in HVC of  
222 isolated birds, we found that HVC network activity can form long repeatable  
223 sequences even in birds that had no prior exposure to vocal tutoring. Sequences  
224 in isolate HVC exhibit some properties of typical HVC, with many neurons reli-  
225 ably participating in sequences, and sequences being correlated to vocal output.  
226 However, sequences in isolated birds were less reliable and less tightly corre-  
227 lated with vocal output than has been described in typical birds, and exhibited  
228 abnormal truncations and persistent activity.

229 We had previously hypothesized that the experience of hearing a tutor may  
230 seed the formation of HVC sequences of the appropriate number and durations  
231 [35], but our new data reveal that HVC sequences exist even prior to tutoring.  
232 Thus, there must be a way for sequences to form without the prior storage of a  
233 tutor memory. In models of Hebbian learning in HVC, sequences can form in  
234 networks driven by random inputs rather than patterned inputs [22]. However,  
235 in this case the distribution of sequence durations no longer matches syllable  
236 durations found in typical adult birds, but is instead more consistent with the  
237 highly variable and atypically long syllables that occur in birds that have never  
238 heard a tutor (isolate song) [12, 10]. Thus our findings may be consistent with  
239 the view that sequences can emerge in isolate birds by a combination of simple  
240 Hebbian learning mechanisms together with spontaneous activity either within  
241 HVC or driven by the inputs to HVC.

242 Our discovery of latent sequences suggests a separation between neural pro-  
243 cesses for building a stable representation of states within a task (i.e., sequential  
244 moments in time), and neural processes for associating an action with each state.  
245 Thus, sequences may gradually emerge in the maturing HVC network via simple  
246 Hebbian processes [23, 22, 17], but may remain relatively decoupled from  
247 downstream motor neurons until a memory of the tutor song is learned and  
248 reinforcement learning processes begin.

249 From a computational perspective, what do latent sequences tell us about  
250 how the brain learns? By latent sequences, we mean sequences that are initially  
251 only weakly correlated with vocal output, but are subsequently used to produce  
252 learned song changes. In reinforcement learning models of song learning, HVC

253 sequences remain relatively stable even as the song changes [36, 37, 38, 39],  
254 consistent with our observation of stable sequences. This is in contrast with  
255 other models of song learning, like the ‘inverse model’ [40, 41, 42]. In the  
256 inverse model, each motor neuron produces the same vocal output at different  
257 times during vocal learning; song changes are caused by pre-motor neurons (e.g.  
258 HVC) being activated in a different order. In contrast, we observed relatively  
259 stable sequences throughout learned song changes. Our results are consistent  
260 with data from primary motor cortex of macaques operating a brain-computer  
261 interface—a fixed repertoire of activity patterns are associated with different  
262 movements after learning [43]. Our results are also consistent with the idea  
263 that the brain may use pre-existing sequential patterns to rapidly learn from  
264 new experience, for example the existence of sequences in the hippocampus prior  
265 to exposure to new environments [44, 45, 46, 47, 48].

266 If the brain is able to build on latent structure to learn from sparse data, es-  
267 sentially implementing inductive bias, we might expect different forms of latent  
268 structure for different tasks. Zebra finches are known to develop typical songs,  
269 including typical syllable durations, after being tutored by atypical isolate songs,  
270 relying on species-specific ‘priors’ to achieve species-typical syllable durations.  
271 The latent sequences we observed tended to last on the order of a hundred mil-  
272 liseconds—the same as the duration of typical zebra finch syllables. Might other  
273 species that sing faster songs (e.g. grasshopper sparrow) or slower songs (e.g.  
274 white-throated sparrow) exhibit latent sequences of shorter or longer durations?  
275 One might imagine that the speed of latent sequences could be genetically spec-  
276 ified by expression levels of ion channels with different time constants within  
277 HVC. Alternatively, the duration of latent sequences could be specified by the  
278 amount of time it takes for HVC to get feedback from respiratory and/or audi-  
279 tory centers, which may also have their own intrinsic rhythmicity [49, 50, 51].  
280 Each of these possible sources of latent HVC structure could be tested in further  
281 experiments. By whatever mechanism latent sequences arise, they appear to be  
282 capable of supporting song learning, at least in the case of delayed tutoring.  
283 More generally, the ability of brains to generate complex learned behavior may  
284 depend on the intrinsic developmental formation of appropriate latent dynamics  
285 in motor and sensory circuits.

## 286 4 Materials and Methods

### 287 4.1 Table of key resources for imaging HVC sequences

288 Key resources, and references for how to access them, are listed in Table 1.

### 289 4.2 Animal care and use

290 For this study, Imaging data was collected in 9 male zebra finches (*Taeniopygia*  
291 *guttata*) from the MIT zebra finch breeding facility (Cambridge, MA). Animal  
292 care and experiments were carried out in accordance with NIH guidelines, and

Table 1: Links to key resources used for measuring HVC sequences during rapid learning

| Software/algorithm                           | Source                    | Link to code                                                                                            |
|----------------------------------------------|---------------------------|---------------------------------------------------------------------------------------------------------|
| seqNMF                                       | [28]                      | <a href="https://github.com/FeeLab/seqNMF">https://github.com/FeeLab/seqNMF</a>                         |
| CNMF_E (cell extraction)                     | [52]                      | <a href="https://github.com/zhoupc/CNMF_E">https://github.com/zhoupc/CNMF_E</a>                         |
| STAT (tracking neurons across days)          | Gu et al., in preparation | will post preprint and submit                                                                           |
| Chronux (spectrogram computation)            | [53]                      | <a href="http://chronux.org/">http://chronux.org/</a>                                                   |
| SAP (Sound Analysis Pro)                     | [29]                      | <a href="http://soundanalysispro.com/">http://soundanalysispro.com/</a>                                 |
| SI (Song Imitation)                          | [31]                      | <a href="https://doi.org/10.1371/journal.pone.0096484">https://doi.org/10.1371/journal.pone.0096484</a> |
| MATLAB                                       | MathWorks                 | <a href="http://www.mathworks.com">www.mathworks.com</a>                                                |
| Dataset                                      | Source                    | Link to data                                                                                            |
| HVC, rapid learning                          | This paper                | will post                                                                                               |
| Other                                        | Source                    | Link                                                                                                    |
| Zebra finches ( <i>Taeniopygia guttata</i> ) | MIT animal facility       |                                                                                                         |
| AAV9.CAG.GCaMP6f.WPRE.SV40                   | [54]                      | <a href="https://pennvectorcore.med.upenn.edu">https://pennvectorcore.med.upenn.edu</a>                 |
| Miniature microscope                         | Inscopix nVista           | <a href="https://www.inscopix.com/nvista">https://www.inscopix.com/nvista</a>                           |

293 reviewed and approved by the Massachusetts Institute of Technology Committee  
 294 on Animal Care.

295 In order to control exposure to a tutor song, 8 birds were foster-raised by  
 296 female birds, which do not sing, starting on or before post-hatch day 15 (15  
 297 dph). Starting between 40 dph and 50 dph, these birds were housed singly in  
 298 custom-made sound isolation chambers. An additional bird was tutored by his  
 299 father, as is typical. After a couple of days of acclimation to the lab environ-  
 300 ment, birds were anesthetized with isoflurane, and were given a surgery to inject  
 301 virus to express the functional indicator GCaMP6f and implant a GRIN (gradi-  
 302 ent index) lens (see below). Analgesic (Buprinex) was administered 30 min  
 303 prior to the surgery, and for 3 days postoperatively. After at least a week for  
 304 virus expression, an Inscopix miniscope baseplate was attached to the existing  
 305 implant. Birds were acclimated to the miniscope for several days. Once birds  
 306 started singing with the miniscope, functional calcium signals were recorded for  
 307 several days. To avoid photobleaching, short files (approximately 10 seconds)  
 308 were obtained, typically fewer than 50 files per day. Once some pre-tutoring  
 309 singing data had been obtained, birds were tutored briefly (5-10 song bouts  
 310 from a tutor bird) each day.

### 311 4.3 Expression of functional calcium indicator GCaMP6f

312 The calcium indicator GCaMP6f was expressed in HVC by intercranial injection  
 313 of the viral vector AAV9.CAG.GCaMP6f.WPRE.SV40 [54] into HVC. In the  
 314 same surgery, a cranial window was made using a relay GRIN (gradient index)  
 315 lens (1mm diameter, 4mm length, Inscopix) implanted on the surface of the  
 316 brain, after the dura was removed. After at least one week, in order to allow  
 317 for sufficient viral expression, recordings were made using the Inscopix nVista  
 318 miniature fluorescent microscope.

#### 319 **4.4 Extraction of neuronal activity and background sub-** 320 **traction using CNMF\_E**

321 Neuronal activity traces were extracted from raw fluorescence movies using a  
322 constrained non-negative matrix factorization algorithm, CNMF\_E, that is spe-  
323 cialized for microendoscope data by including a local background model to re-  
324 move activity from out-of-focus cells [52]. Custom software (Shijie Gu, Emily  
325 Mackevicius, Pengcheng Zhou) was used extend the CNMF\_E algorithm to com-  
326 bine batches of short files (BatchVer) and track individual neurons over the  
327 course of multiple days (STAT, Gu, et. al., in preparation, see below).

#### 328 **4.5 Unsupervised discovery of neural sequences using seqNMF**

329 We addressed the challenge of needing to detect neural sequences in HVC with-  
330 out relying on aligning neural activity to the song by developing an unsupervised  
331 algorithm, seqNMF [28]. This was necessary because juvenile songs are highly  
332 variable and difficult to parse into repeatable syllables, and because we wanted  
333 to allow for the possibility that HVC activity might be more stereotyped than  
334 the song. Briefly, seqNMF factorizes data into exemplar sequence factors ( $\mathbf{W}$ 's).  
335 Each sequence factor has a corresponding timecourse ( $\mathbf{H}$ ). Convolving each ex-  
336 emplar with its respective timecourse produces an approximate reconstruction  
337 of the original data ( $\tilde{X} = \mathbf{W} \circledast \mathbf{H}$ ). SeqNMF returns a factorization that min-  
338 imizes reconstruction error, subject to a penalty term that encourages simpler  
339 factorizations.

#### 340 **4.6 Preprocessing calcium traces prior to running seqNMF**

341 We performed several preprocessing steps before applying seqNMF to functional  
342 calcium traces extracted by CNMF\_E. First, we estimated burst times from the  
343 raw traces by deconvolving the traces using an AR-2 process. The deconvolution  
344 parameters (time constants and noise floor) were estimated for each neuron using  
345 the CNMF\_E code package [52]. Some neurons exhibited larger peaks than  
346 others, likely due to different expression levels of the calcium indicator. Since  
347 seqNMF would prioritize the neurons with the most power, we renormalized  
348 by dividing the signal from each neuron by the sum of the maximum value of  
349 that row and the 95<sup>th</sup> percentile of the signal across all neurons. In this way,  
350 neurons with larger peaks were given some priority, but not much more than  
351 that of neurons with weaker signals.

#### 352 **4.7 Estimating the number of significant sequences in each** 353 **dataset**

354 The number of sequences present in real neuronal datasets can be slightly am-  
355 biguous, so we used several methods to arrive at and validate an estimate for  
356 the number of significant neural sequences present in each dataset. It is impor-  
357 tant to note that, since our datasets are short, there may be additional neural

358 sequences in HVC that do not appear, or do not achieve significance, in our  
359 datasets. In order to cross-validate sequences on held-out data, we split each  
360 dataset into a training set (75%) and a test set (25%). Sequences were detected  
361 in the training set, and significance was measured in the test set by assessing  
362 how much the overlap of the sequences with the test data compared to null  
363 (time-shifted) sequences. In order to choose a value for the seqNMF param-  
364 eter  $\lambda$  that balances reconstruction cost with correlation (redundancy) cost, we  
365 swept  $\lambda$  with  $K = 10$  and  $L = 0.5$  seconds to find  $\lambda_0$ , the cross-over point that  
366 balances these cost terms (Figure S2A). Based on analysis on simulated data  
367 [28], where values of  $\lambda$  at or slightly above  $\lambda_0$  yielded the correct number of  
368 sequences, we looked at the distribution of significant sequences at  $\lambda = \lambda_0$  and  
369  $\lambda = 2\lambda_0$  (Figure S2B), and chose as our estimate a number between the peaks of  
370 these two distributions. We validated these estimates in two ways. First, we ran  
371 seqNMF with  $K$  equal to this estimate and  $\lambda = 0$ , and confirmed that the result-  
372 ing sequences tended to be significant on held-out data. Next, we ran seqNMF  
373 on the entire dataset at this  $K$  from 25 different random initial conditions, and  
374 confirmed that the sequences were consistent across the different runs (Figure  
375 S2C). Consistency measures the extent to which there is a one-to-one mapping  
376 between the factors of two different factorizations [28]. When this analysis was  
377 run at a  $K$  higher than the estimated  $K$ , results tended to be less consistent  
378 (Figure S2D).

#### 379 4.8 Selecting a consistent factorization

380 For each dataset, we selected the most consistent factorization on which to  
381 perform all further analysis. Once we had selected an appropriate number of  
382 sequences for each dataset, using the analyses described above, we ran seqNMF  
383 25 times at this value of  $K$  from different random initial conditions, and picked  
384 the factorization that was most consistent with the other factorizations (Figure  
385 S2D). Factorizations at  $K$  chosen by the above methods tended to be more  
386 consistent than factorizations at higher  $K$  (Figure S2D).

#### 387 4.9 Significance testing for cross-correlation analyses

388 Several of our results involve analyzing the temporal relationship between differ-  
389 ent timecourses (factors and neurons; factors and song acoustic features; factor  
390 autocorrelations). These analyses involve testing the significance of the cross-  
391 correlation between two timeseries, compared to null cross-correlation values  
392 that could occur if the signals were circularly shifted relative to each other by  
393 a random large timelag. Before measuring cross-correlations, we centered each  
394 signal to have zero mean. If we are assessing the cross-correlation at lags in the  
395 range from  $-L$  to  $L$ , we want to compare values measured here to null values  
396 measured at random lags longer than  $L$ . We compute the cross-correlation at  
397 each lag  $\ell$  in the range  $-T < \ell < T$ , where  $T$  is the length of the timeseries,  
398 by circularly shifting one of the timeseries by  $\ell$  and computing the dot prod-  
399 uct with the other timeseries. We then use the cross-correlations at null lags

400  $(-(T - L) < \ell < -L \text{ or } L < \ell < (T - L))$  to determine a Bonferroni-corrected  
401 significance threshold. The threshold is the  $100 \times (1 - p/Num)^{th}$  percentile of  
402 the absolute value of these null cross-correlations, where  $Num$  is the number  
403 of comparisons ( $2L$  times the number of tests being run), and  $p$  is the  $p$ -value.  
404 Significance is achieved for lags at which the measured cross-correlation exceeds  
405 this value.

#### 406 **4.10 Assessing song locking, the cross-correlation between** 407 **each factor and acoustic song features**

408 Several of our results involve quantifying the temporal relationship between  
409 sequence timecourses ( $\mathbf{H}$ 's) and the song. To do this, we measured the cross-  
410 correlation of sequences with song acoustics using 8 acoustic features common  
411 in the songbird literature [29]: amplitude, entropy, pitch goodness, aperiodicity,  
412 mean frequency, pitch, frequency modulation, and amplitude modulation. Each  
413 of these acoustic features is measured from the song at 1ms resolution using  
414 standard software (Sound Analysis Pro, <http://soundanalysispro.com/>, [29]).  
415 The seqNMF  $\mathbf{H}$ 's are upsampled to this resolution, then cross-correlation be-  
416 tween each  $\mathbf{H}$  and each song feature is assessed using the above procedure, with  
417  $L = 1$  second,  $p = 0.05$ , and Bonferroni correction ( $2000$  timebins)  $\times$  ( $8$  features)  
418  $\times$  ( $K$  sequences). The overall measure of song locking is computed by integrat-  
419 ing the number of seconds that a given sequence has significant correlation with  
420 each of the song features.

#### 421 **4.11 Assessing which neurons participate in each sequence**

422 Several of our results involve assessing which neurons participate in each se-  
423 quence. In order to do this, we measure whether there is a significant cross-  
424 correlation between each neuron and each factor (with  $L=0.5$  seconds,  $p = 0.05$ ,  
425 and Bonferroni correction ( $30$  timebins)  $\times$  ( $N$  neurons)  $\times$  ( $K$  sequences)). Note  
426 that, since seqNMF is run on the neural data, it is guaranteed that some neurons  
427 will be correlated with the factors—the primary aim of this test is to assess  
428 which neurons are in which sequences.

#### 429 **4.12 Tracking HVC projection neurons over the course of** 430 **major song changes**

431 A core motivation for using calcium imaging methods instead of other methods  
432 was the possibility to track HVC projection neurons over the course of major  
433 song changes. HVC projection neurons are particularly difficult to record with  
434 electrophysiological methods—current methods are unable to record an HVC  
435 projection neuron for more than a few hours, and tend to record one, or at most  
436 three, projection neurons at a time [55, 17]. Previous studies of song-locked HVC  
437 activity throughout the learning process could only track changes in the neural  
438 population that occurred at a timescale slower than a week, because population  
439 statistics had to be compiled from single-neuron recordings [17]. This technique



440 misses rapid changes that can happen within a day [32], and is unable to assess  
441 the stability of HVC sequences.

442 Stability of HVC sequences over time can be assessed using calcium imag-  
443 ing, though some challenges remain due to the potential for errors in tracking  
444 neurons across days. Single-photon calcium imaging methods have been used  
445 to address the stability of HVC sequences in adult birds with stable songs, ob-  
446 serving stable song-locked activity in slightly more than half of HVC projection  
447 neurons, and unstable song-locked activity in slightly less than half of HVC pro-  
448 jection neurons [56]. This measure is likely an underestimate of the stability of  
449 HVC activity, since noise in tracking cell locations across days could lead to per-  
450 ceived instability. Thus, HVC sequences appear relatively stable in birds with  
451 stable song, but what about birds whose songs are changing? The potential for  
452 errors in tracking neurons across days was one factor in our decision to record  
453 in birds undergoing very rapid learning. It was necessary for us to expand upon  
454 previous methods for tracking neurons recorded by calcium imaging over time  
455 [57], likely due to the relatively short individual file sizes in our dataset from  
456 singing juvenile birds (we recorded many short files each day, when the birds  
457 happened to sing, instead of longer continuous files).

458 We tracked the activity of populations of HVC neurons over multiple days  
459 using Spatial Tracking Across Time (STAT, Gu et al., in preparation). This  
460 method builds off of previous methods [57], where individual cell pairs' shape  
461 spatial correlation and distance are used to determine the correspondences be-  
462 tween cells extracted from different sessions. STAT also considers local neigh-  
463 borhood motion consistency in computing the optimal tracking of cells across  
464 sessions, and requires less manual supervision. The local motion consistency is  
465 optimized using the Hungarian Method, a combinatorial optimization algorithm  
466 that solves assignment problems in polynomial time. Cells that have no good  
467 match are excluded, as are cells with abnormal coefficient of variations. Finally,  
468 the results of the matching algorithm are checked manually.

### 469 **4.13 Tracking sequences extracted on one subset of a dataset** 470 **to another subset of the dataset**

471 In order to track a sequence,  $\mathbf{W}$ , extracted in one subset of a dataset ( $\mathbf{X}_1$ ,  
472 for example before tutoring) to another subset of the dataset ( $\mathbf{X}_2$ , for example  
473 after tutoring), we first mean-subtract  $\mathbf{W}$  and  $\mathbf{X}_2$  along the time dimension,  
474 then estimate  $\tilde{\mathbf{H}}_2 = \mathbf{W}^\top \circledast \mathbf{X}_2$ . In order to assess whether a neuron significantly  
475 participates in  $\mathbf{W}$  in dataset  $\mathbf{X}_2$ , we bootstrap using control datasets  $\mathbf{X}_2^{shuff}$ , in  
476 which data from each neuron is circularly shifted in time by a different random  
477 amount. We then ask whether the neuron participates more strongly in the  
478 real dataset compared to participation calculated on control datasets (p=0.05  
479 significance threshold, Bonferroni corrected for the number of neurons and the  
480 number of time-lags). Specifically, we compare  $\tilde{\mathbf{W}}_2 = \mathbf{X}_2 \tilde{\mathbf{H}}_2^\top$  to  $\tilde{\mathbf{W}}_2^{shuff} =$   
481  $\mathbf{X}_2^{shuff} \tilde{\mathbf{H}}_2^{shuff^\top}$ .

## 482 5 Assessing sequence coverage of song bouts

483 Sequence coverage quantifies the observation that sequences in isolated birds ap-  
484 pear to pop on and off at somewhat arbitrary moments in bouts, leaving some  
485 sections of some bouts with no clear sequences present. First, the moments when  
486 each sequence occurs is estimated by computing when  $\tilde{\mathbf{H}} = \mathbf{W}^\top \circledast \mathbf{X}$  is larger  
487 than expected by chance (Bonferroni-corrected 95% percentile of  $\tilde{\mathbf{H}}^{shuff} =$   
488  $\mathbf{W}^\top \circledast \mathbf{X}^{shuff}$ ). Next, the sequence is convolved with the corresponding  $\mathbf{W}$ .  
489 Finally, the total number of seconds when some sequences was present is di-  
490 vided by the total number of seconds in the bout, and multiplied by 100, to get  
491 the percent of the bout covered by some sequence. Note that sequence cover-  
492 age is distinct from previously described measures of burst coverage within a  
493 repeatable adult song motif [18].

## 494 References

- 495 [1] Noam Chomsky. On nature and language. Cambridge University Press,  
496 2002.
- 497 [2] Torsten N. Wiesel and David H. Hubel. Single-cell responses in striate  
498 cortex of kittens deprived of vision in one eye. Journal of Neurophysiology,  
499 26(6):1003–1017, 1963. PMID: 14084161.
- 500 [3] M. Bear and W. Singer. Modulation of visual cortical plasticity by acetyl-  
501 choline and noradrenaline. Nature, 320:172–176, 1986.
- 502 [4] Brandon J. Farley, Hongbo Yu, Dezhe Z. Jin, and Mriganka Sur. Alteration  
503 of visual input results in a coordinated reorganization of multiple visual  
504 cortex maps. Journal of Neuroscience, 27(38):10299–10310, 2007.
- 505 [5] Jie Ye, Priti Gupta, Pragya Shah, Kashish Tiwari, Tapan Gandhi, Suma  
506 Ganesh, Flip Phillips, Dennis Levi, Frank Thorn, Sidney Diamond, Peter  
507 Bex, and Pawan Sinha. Resilience of temporal processing to early and  
508 extended visual deprivation. Vision Research, 186:80–86, 2021.
- 509 [6] Kathryn L Hildyard and David A Wolfe. Child neglect: developmental  
510 issues and outcomes. Child Abuse and Neglect, 26(6):679–695, 2002.
- 511 [7] I. Moreno-Torres, S. Madrid-Cánovas, and G. Blanco-Montañez. Sensitive  
512 periods and language in cochlear implant users. Journal of child language,  
513 43:479–504, 2016.
- 514 [8] A. Kral, M. F. Dorman, and B. S. Wilson. Neuronal development of hearing  
515 and language: Cochlear implants and critical periods. Annual review of  
516 neuroscience, 42:47–65, 2019.
- 517 [9] Ofer Tchernichovski and Gary Marcus. Vocal learning beyond imitation:  
518 mechanisms of adaptive vocal development in songbirds and human infants.  
519 Current Opinion in Neurobiology, 28:42–47, 2014.

- 520 [10] Philip H Price. Developmental Determinants of Structure in Zebra Finch  
521 Song. *93*(2):260–277, 1979.
- 522 [11] Heather Williams, Kerry Kilander, and Mary Lou Sotanski. Untutored  
523 song, reproductive success and song learning. *Animal Behaviour*, 45(4):695–  
524 705, apr 1993.
- 525 [12] Olga Fehér, Haibin Wang, Sigal Saar, Partha P Mitra, and Ofer Tcherni-  
526 chovski. De novo establishment of wild-type song culture in the zebra finch.  
527 *Nature*, 459(7246):564–568, may 2009.
- 528 [13] Mugdha Deshpande, Fakhridin Pirlepsov, and Thierry Lints. Rapid en-  
529 coding of an internal model for imitative learning. *Proceedings of the Royal*  
530 *Society of London B: Biological Sciences*, 281(1781), 2014.
- 531 [14] Lucy A Eales. Do zebra finch males that have been raised by another  
532 species still tend to select a conspecific song tutor? *Animal Behaviour*,  
533 35(5):1347–1355, 1987.
- 534 [15] Mets D.G. and Brainard M.S. Genetic variation interacts with experience  
535 to determine interindividual differences in learned song. *Proc Natl Acad*  
536 *Sci*, 115(2):421–426, January 2018.
- 537 [16] David G Mets and Michael S Brainard. Learning is enhanced by tailoring  
538 instruction to individual genetic differences. *Elife*, 8:e47216, 2019.
- 539 [17] Tatsuo S. Okubo, Emily L. Mackevicius, Hannah L. Payne, Galen F. Lynch,  
540 and Michale S. Fee. Growth and splitting of neural sequences in songbird  
541 vocal development. *Nature*, 528(7582):352–357, nov 2015.
- 542 [18] Galen F Lynch, Tatsuo S Okubo, Alexander Hanuschkin, Richard HR  
543 Hahnloser, and Michale S Fee. Rhythmic continuous-time coding in the  
544 songbird analog of vocal motor cortex. *Neuron*, 90(4):877–892, 2016.
- 545 [19] Michel A. Picardo, Josh Merel, Kalman A. Katlowitz, Daniela Vallentin,  
546 Daniel E. Okobi, Sam E. Benezra, Rachel C. Clary, Eftychios A. Pnev-  
547 matikakis, Liam Paninski, and Michael A. Long. Population-Level Repre-  
548 sentation of a Temporal Sequence Underlying Song Production in the Zebra  
549 Finch. *Neuron*, 90(4):866–876, may 2016.
- 550 [20] G. Kosche, D. Vallentin, and M. A. Long. Interplay of Inhibition and  
551 Excitation Shapes a Premotor Neural Sequence. *Journal of Neuroscience*,  
552 35(3):1217–1227, jan 2015.
- 553 [21] D. Vallentin, G. Kosche, D. Lipkind, and M. A. Long. Inhibition protects  
554 acquired song segments during vocal learning in zebra finches. *Science*,  
555 351(6270):267–271, jan 2016.

- 556 [22] Ila R Fiete, Walter Senn, Claude Z H Wang, and Richard H R Hahnloser.  
557 Spike-time-dependent plasticity and heterosynaptic competition organize  
558 networks to produce long scale-free sequences of neural activity. Neuron,  
559 65(4):563–76, feb 2010.
- 560 [23] Joseph K Jun and Dezhe Z Jin. Development of neural circuitry for precise  
561 temporal sequences through spontaneous activity, axon remodeling, and  
562 synaptic plasticity. PloS one, 2(8):e723, jan 2007.
- 563 [24] Sarah E. London. Developmental song learning as a model to understand  
564 neural mechanisms that limit and promote the ability to learn. Behavioural  
565 Processes, 163:13–23, jun 2019.
- 566 [25] Sharon M.H. Gobes, Rebecca B. Jennings, and Rie K. Maeda. The sensi-  
567 tive period for auditory-vocal learning in the zebra finch: Consequences of  
568 limited-model availability and multiple-tutor paradigms on song imitation.  
569 Behavioural Processes, 163:5–12, jun 2019.
- 570 [26] Klaus Immelmann. Song development in the zebra finch and other estrildid  
571 finches. Bird vocalizations, pages 61–77, 1969.
- 572 [27] Michael A Long, Dezhe Z Jin, and Michale S Fee. Support for a synaptic  
573 chain model of neuronal sequence generation. Nature, 468(7322):394–399,  
574 nov 2010.
- 575 [28] Emily L Mackevicius, Andrew H Bahle, Alex H Williams, Shijie Gu, Nata-  
576 lialia I Denisenko, Mark S Goldman, and Michale S Fee. Unsupervised  
577 discovery of temporal sequences in high-dimensional datasets, with appli-  
578 cations to neuroscience. Elife, 8:e38471, 2019.
- 579 [29] Ofer Tchernichovski, Fernando Nottebohm, Ching Elizabeth Ho, Bijan Pe-  
580 sاران, and Partha Pratim Mitra. A procedure for an automated measure-  
581 ment of song similarity. Animal behaviour, 59(6):1167–1176, 2000.
- 582 [30] Jeffrey Cynx. Experimental determination of a unit of song production in  
583 the zebra finch (*Taeniopygia guttata*). Journal of Comparative Psychology,  
584 104(1):3–10, 1990.
- 585 [31] Yael Mandelblat-Cerf and Michale S. Fee. An Automated Procedure for  
586 Evaluating Song Imitation. PLoS ONE, 9(5):e96484, may 2014.
- 587 [32] O Tchernichovski, P P Mitra, T Lints, and F Nottebohm. Dynamics of the  
588 vocal imitation process: how a zebra finch learns its song. Science (New  
589 York, N.Y.), 291(5513):2564–2569, mar 2001.
- 590 [33] Dina Lipkind and Ofer Tchernichovski. Quantification of developmen-  
591 tal birdsong learning from the subsyllabic scale to cultural evolution.  
592 Proceedings of the National Academy of Sciences of the United States of  
593 America, 108 Suppl:15572–15579, sep 2011.

- 594 [34] Dina Lipkind, Gary F Marcus, Douglas K Bemis, Kazutoshi Sasahara, Nori  
595 Jacoby, Miki Takahasi, Kenta Suzuki, Olga Feher, Primoz Ravbar, Kazuo  
596 Okanoya, and Ofer Tchernichovski. Stepwise acquisition of vocal combina-  
597 torial capacity in songbirds and human infants. Nature, 498(7452):104–108,  
598 jun 2013.
- 599 [35] Emily Lambert Mackevicius and Michale Sean Fee. Building a state space  
600 for song learning. Current Opinion in Neurobiology, 49:59–68, 2018.
- 601 [36] Kenji Doya and Terrence J Sejnowski. Birdsong vocalization learning.  
602 Advances in Neural Information Processing Systems 7, 7:101, 1995.
- 603 [37] Ila R Fiete, Michale S Fee, and H Sebastian Seung. Model of birdsong  
604 learning based on gradient estimation by dynamic perturbation of neural  
605 conductances. Journal of neurophysiology, 98(4):2038–2057, oct 2007.
- 606 [38] M S Fee and J H Goldberg. A hypothesis for basal ganglia-dependent  
607 reinforcement learning in the songbird. Neuroscience, 198:152–70, dec 2011.
- 608 [39] Michael S Brainard and Allison J Doupe. Translating birdsong: song-  
609 birds as a model for basic and applied medical research. Annual review of  
610 neuroscience, 36:489–517, jul 2013.
- 611 [40] Nicolas Giret, Joergen Kornfeld, Surya Ganguli, and Richard H R Hahn-  
612 loser. Evidence for a causal inverse model in an avian cortico-basal ganglia  
613 circuit. Proceedings of the National Academy of Sciences of the United  
614 States of America, 111(16):6063–8, apr 2014.
- 615 [41] A Hanuschkin, S Ganguli, and R H R Hahnloser. A Hebbian learning rule  
616 gives rise to mirror neurons and links them to control theoretic inverse  
617 models. Frontiers in neural circuits, 7:106, jan 2013.
- 618 [42] Richard Hahnloser and Surya Ganguli. Vocal Learning with Inverse Models.  
619 In Principles of Neural Coding, pages 547–564. CRC Press, may 2013.
- 620 [43] Matthew D. Golub, Patrick T. Sadtler, Emily R. Oby, Kristin M. Quick,  
621 Stephen I. Ryu, Elizabeth C. Tyler-Kabara, Aaron P. Batista, Steven M.  
622 Chase, and Byron M. Yu. Learning by neural reassociation. Nature  
623 Neuroscience, 21(4):607–616, apr 2018.
- 624 [44] Vincent Villette, Arnaud Malvache, Thomas Tressard, Nathalie Dupuy, and  
625 Rosa Cossart. Internally recurring hippocampal sequences as a population  
626 template of spatiotemporal information. Neuron, 88(2):357–366, 2015.
- 627 [45] Usman Farooq, Jeremie Sibille, Kefei Liu, and George Dragoi. Strength-  
628 ened temporal coordination within pre-existing sequential cell assemblies  
629 supports trajectory replay. Neuron, 103(4):719–733, 2019.

- 630 [46] Sam McKenzie, Roman Huszár, Daniel F English, Kanghai Kim, Fletcher  
631 Christensen, Euisik Yoon, and György Buzsáki. Preexisting hippocampal  
632 network dynamics constrain optogenetically induced place fields. *Neuron*,  
633 109(6):1040–1054, 2021.
- 634 [47] George Dragoi. Cell assemblies, sequences and temporal coding in the  
635 hippocampus. *Current opinion in neurobiology*, 64:111–118, 2020.
- 636 [48] Sam McKenzie, Roman Huszár, Daniel F English, Kanghai Kim, Fletcher  
637 Christensen, Euisik Yoon, and György Buzsáki. Preexisting hippocampal  
638 network dynamics constrain optogenetically induced place fields. *Neuron*,  
639 109(6):1040–1054, 2021.
- 640 [49] Marc F Schmidt and Franz Goller. Breathtaking songs: coordinating the  
641 neural circuits for breathing and singing. *Physiology*, 31(6):442–451, 2016.
- 642 [50] Kosuke Hamaguchi, Masashi Tanaka, and Richard Mooney. A Dis-  
643 tributed Recurrent Network Contributes to Temporally Precise Vocaliza-  
644 tions. *Neuron*, 91(3):680–693, aug 2016.
- 645 [51] Emily L Mackevicius, Michael TL Happ, and Michale S Fee. An avian  
646 cortical circuit for chunking tutor song syllables into simple vocal-motor  
647 units. *Nature communications*, 11(1):1–16, 2020.
- 648 [52] Pengcheng Zhou, Shanna L Resendez, Jose Rodriguez-Romaguera, Jes-  
649 sica C Jimenez, Shay Q Neufeld, Andrea Giovannucci, Johannes Friedrich,  
650 Eftychios A Pnevmatikakis, Garret D Stuber, Rene Hen, Mazen A Kheir-  
651 bek, Bernardo L Sabatini, Robert E Kass, and Liam Paninski. Efficient  
652 and accurate extraction of in vivo calcium signals from microendoscopic  
653 video data. *eLife*, 7:e28728, feb 2018.
- 654 [53] P. Mitra and H. Bokil. *Observed Brain Dynamics*. Oxford University Press,  
655 USA, 2007.
- 656 [54] Tsai-Wen Chen, Trevor J Wardill, Yi Sun, Stefan R Pulver, Sabine L Ren-  
657 ninger, Amy Baohan, Eric R Schreier, Rex A Kerr, Michael B Orger,  
658 Vivek Jayaraman, Loren L Looger, Karel Svoboda, and Douglas S Kim.  
659 Ultrasensitive fluorescent proteins for imaging neuronal activity. *Nature*,  
660 499(7458):295–300, jul 2013.
- 661 [55] Tatsuo S Okubo, Emily L Mackevicius, and Michale S Fee. In vivo recording  
662 of single-unit activity during singing in zebra finches. *Cold Spring Harbor*  
663 *protocols*, 2014(12):1273–83, dec 2014.
- 664 [56] William A Liberti, Jeffrey E Markowitz, L Nathan Perkins, Derek C Liberti,  
665 Daniel P Leman, Grigori Guitcount, Tarciso Velho, Darrell N Kotton,  
666 Carlos Lois, and Timothy J Gardner. Unstable neurons underlie a stable  
667 learned behavior. *Nature Neuroscience*, 19(12):1665–1671, dec 2016.



668 [57] Liron Sheintuch, Alon Rubin, Noa Brande-Eilat, Nitzan Geva, Noa Sadeh,  
669 Or Pinchasof, and Yaniv Ziv. Tracking the Same Neurons across Multiple  
670 Days in Ca<sup>2+</sup>Imaging Data. *Cell Reports*, 21(4):1102–1115, 2017.

## 671 **6 Acknowledgements**

672 This work was supported by a grant from the Simons Collaboration for the  
673 Global Brain, the National Institutes of Health (NIH) [R01 DC009183] and  
674 the G Harold and Leila Y Mathers Charitable Foundation. ELM received sup-  
675 port through the NDSEG Fellowship program and the Simons Society of Fel-  
676 lows. Special thanks to Andrew Bahle for comments on earlier versions of the  
677 manuscript.

678 **Supplementary figures**

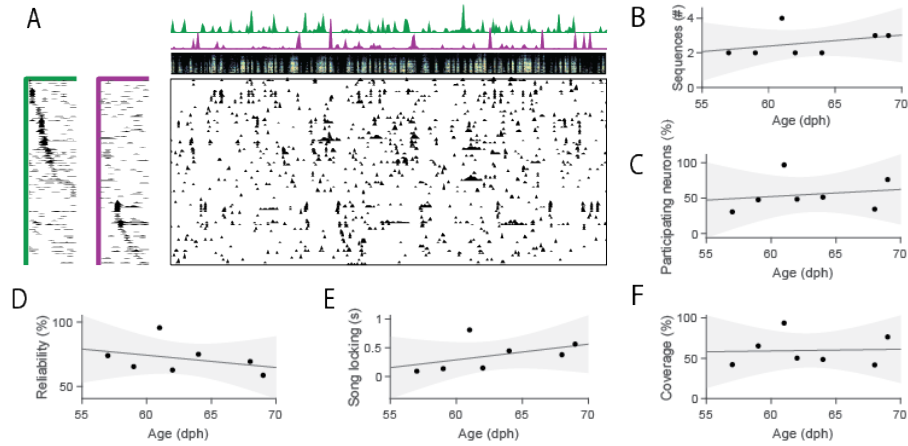

Figure S1: HVC sequences exist even in young isolated birds  
(A) Example HVC sequences recorded in a young isolated bird (59 dph) (B-F) Sequence properties as a function of age in 7 juvenile isolated birds (5 birds recorded prior to the closing of the traditional critical period (<65 dph), and 2 older juvenile birds (65 dph - 90 dph)). Line denotes least squares fit, gray area 95% confidence interval. (B) Number of HVC sequences extracted. (C) Percent of neurons participating in at least one sequence. (D) Reliability of neural participation across sequence renditions. (E) Song locking. (F) Percent of the song covered by at least one sequence.

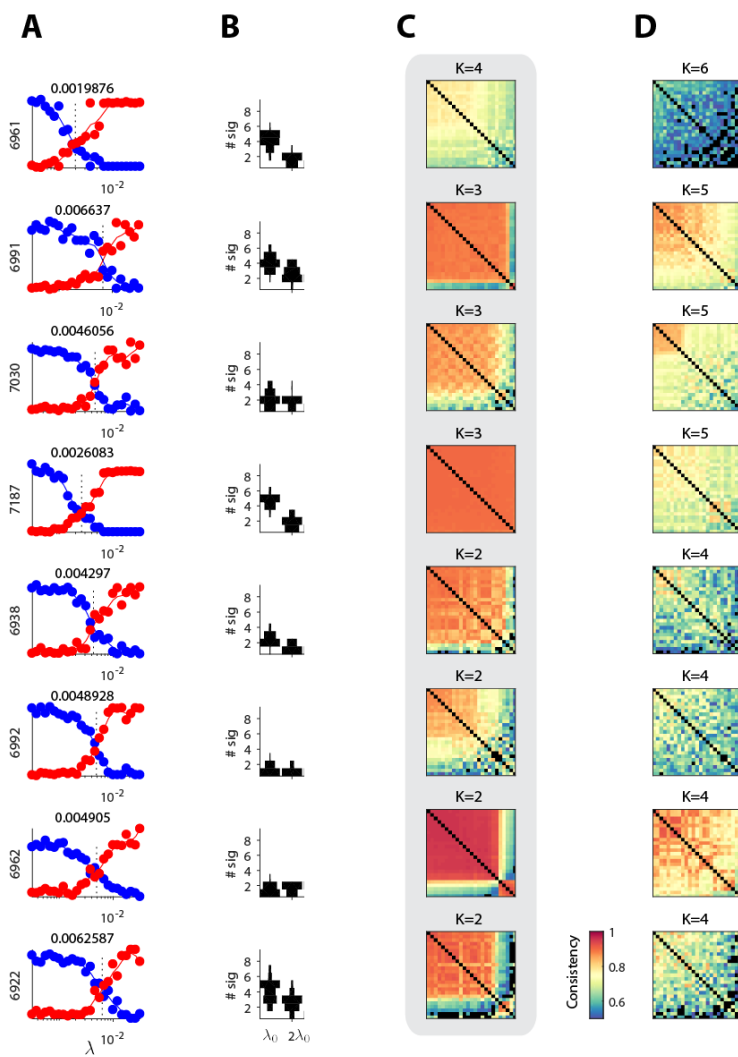

Figure S2: Supplementary Figure 1. Estimating the number of significant sequences in each dataset

(A) Reconstruction cost (red) and correlation cost (blue) as a function of  $\lambda$  (with  $K=10$ ,  $L=0.5$  seconds) for 8 datasets (pre-tutoring data from 8 different birds). The crossover point,  $\lambda_0$ , is stated and marked by a dashed line. (B) Histogram of the number of significant sequences at  $\lambda_0$  and  $2\lambda_0$  for these datasets. (C) For the chosen  $K$ , and  $\lambda = 0$ , consistency across 25 runs of seqNMF from different random initializations. Factorizations are sorted from most to least consistent. (D) Consistency matrix for 25 runs at  $K$  above the estimated  $K$ .
